# Supplementary material for: Electronic coupling in 1,4-(COS)2C6H4 linked MM quadruple bonds (M = Mo, W): the influence of S for O substitution
Source: Royal Society of Chemistry journal article supplement (doi:10.1039/b600983b), 2006-01-01

**Electronic Coupling in 1,4-(COS)<sub>2</sub>-C<sub>6</sub>H<sub>4</sub> Linked MM**

**Quadruple Bonds (M = Mo, W):**

**The Influence of S for O Substitution**

Malcolm H. Chisholm\* and Nathan J. Patmore

Department of Chemistry, The Ohio State University  
100 W. 18<sup>th</sup> Avenue, Columbus, OH 43210-1185 USA

**Full Reference 11 from main manuscript:**

M. J. Frisch, G. W. T., H. B. Schlegel, G. E. Scuseria, M. A. Robb, J. R. Cheeseman, J. A. Montgomery, Jr., T. Vreven, K. N. Kudin, J. C. Burant, J. M. Millam, S. S. Iyengar, J. Tomasi, V. Barone, B. Mennucci, M. Cossi, G. Scalmani, N. Rega, G. A. Petersson, H. Nakatsuji, M. Hada, M. Ehara, K. Toyota, R. Fukuda, J. Hasegawa, M. Ishida, T. Nakajima, Y. Honda, O. Kitao, H. Nakai, M. Klene, X. Li, J. E. Knox, H. P. Hratchian, J. B. Cross, C. Adamo, J. Jaramillo, R. Gomperts, R. E. Stratmann, O. Yazyev, A. J. Austin, R. Cammi, C. Pomelli, J. W. Ochterski, P. Y. Ayala, K. Morokuma, G. A. Voth, P. Salvador, J. J. Dannenberg, V. G. Zakrzewski, S. Dapprich, A. D. Daniels, M. C. Strain, O. Farkas, D. K. Malick, A. D. Rabuck, K. Raghavachari, J. B. Foresman, J. V. Ortiz, Q. Cui, A. G. Baboul, S. Clifford, J. Cioslowski, B. B. Stefanov, G. Liu, A. Liashenko, P. Piskorz, I. Komaromi, R. L. Martin, D. J. Fox, T. Keith, M. A. Al-Laham, C. Y. Peng, A. Nanayakkara, M. Challacombe, P. M. W. Gill, B. Johnson, W. Chen, M. W. Wong, C. Gonzalez, J. A. Pople; *Gaussian 03*, Revision C.02 ed.; Gaussian, Inc.: Pittsburgh, PA, 2003.

**Table S1.** Atomic coordinates for the geometry optimized structure of  
[(HCO<sub>2</sub>)<sub>3</sub>Mo<sub>2</sub>]<sub>2</sub>(μ-O<sub>2</sub>C-C<sub>6</sub>H<sub>4</sub>-CO<sub>2</sub>) (Mo4T') in D<sub>2h</sub> symmetry.

| Atom Number | Element | Coordinates / Å |           |           |
|-------------|---------|-----------------|-----------|-----------|
|             |         | x               | y         | z         |
| 1           | C       | -0.694498       | 0         | 1.214733  |
| 2           | C       | -0.694498       | 0         | -1.214733 |
| 3           | C       | 0.694498        | 0         | 1.214733  |
| 4           | C       | 0.694498        | 0         | -1.214733 |
| 5           | C       | 1.400145        | 0         | 0         |
| 6           | C       | -1.400145       | 0         | 0         |
| 7           | C       | -2.87819        | 0         | 0         |
| 8           | C       | 2.87819         | 0         | 0         |
| 9           | O       | -3.512544       | 0         | 1.116879  |
| 10          | O       | -3.512544       | 0         | -1.116879 |
| 11          | O       | 3.512544        | 0         | 1.116879  |
| 12          | O       | 3.512544        | 0         | -1.116879 |
| 13          | Mo      | 5.611964        | 0         | 1.059302  |
| 14          | Mo      | 5.611964        | 0         | -1.059302 |
| 15          | Mo      | -5.611964       | 0         | 1.059302  |
| 16          | Mo      | -5.611964       | 0         | -1.059302 |
| 17          | O       | -5.618818       | 2.120573  | 1.121521  |
| 18          | O       | -5.618818       | 2.120573  | -1.121521 |
| 19          | O       | -5.618818       | -2.120573 | 1.121521  |
| 20          | O       | -5.618818       | -2.120573 | -1.121521 |
| 21          | O       | 5.618818        | 2.120573  | 1.121521  |
| 22          | O       | 5.618818        | 2.120573  | -1.121521 |
| 23          | O       | 5.618818        | -2.120573 | 1.121521  |
| 24          | O       | 5.618818        | -2.120573 | -1.121521 |
| 25          | O       | -7.735463       | 0         | -1.121738 |
| 26          | O       | -7.735463       | 0         | 1.121738  |
| 27          | O       | 7.735463        | 0         | -1.121738 |
| 28          | O       | 7.735463        | 0         | 1.121738  |
| 29          | H       | 1.246969        | 0         | -2.147831 |
| 30          | H       | 1.246969        | 0         | 2.147831  |
| 31          | H       | -1.246969       | 0         | -2.147831 |
| 32          | H       | -1.246969       | 0         | 2.147831  |
| 33          | C       | -5.621398       | 2.721756  | 0         |
| 34          | C       | -5.621398       | -2.721756 | 0         |
| 35          | C       | 5.621398        | 2.721756  | 0         |
| 36          | C       | 5.621398        | -2.721756 | 0         |
| 37          | C       | -8.336254       | 0         | 0         |
| 38          | C       | 8.336254        | 0         | 0         |
| 39          | H       | -5.626544       | -3.816092 | 0         |
| 40          | H       | -5.626544       | 3.816092  | 0         |
| 41          | H       | 5.626544        | -3.816092 | 0         |
| 42          | H       | 5.626544        | 3.816092  | 0         |
| 43          | H       | -9.430669       | 0         | 0         |
| 44          | H       | 9.430669        | 0         | 0         |

**Table S2.** Atomic coordinates for the geometry optimized structure of  
[(HCO<sub>2</sub>)<sub>3</sub>W<sub>2</sub>]<sub>2</sub>(μ-O<sub>2</sub>C-C<sub>6</sub>H<sub>4</sub>-CO<sub>2</sub>) (W4T') in D<sub>2h</sub> symmetry.

| Atom Number | Element | Coordinates / Å |           |           |
|-------------|---------|-----------------|-----------|-----------|
|             |         | x               | y         | z         |
| 1           | C       | 0.693764        | 1.21483   | 0         |
| 2           | C       | 0.693764        | -1.21483  | 0         |
| 3           | C       | -0.693764       | 1.21483   | 0         |
| 4           | C       | -0.693764       | -1.21483  | 0         |
| 5           | C       | -1.403336       | 0         | 0         |
| 6           | C       | 1.403336        | 0         | 0         |
| 7           | C       | 2.873576        | 0         | 0         |
| 8           | C       | -2.873576       | 0         | 0         |
| 9           | O       | 3.514461        | 1.120899  | 0         |
| 10          | O       | 3.514461        | -1.120899 | 0         |
| 11          | O       | -3.514461       | 1.120899  | 0         |
| 12          | O       | -3.514461       | -1.120899 | 0         |
| 13          | W       | -5.599555       | 1.101027  | 0         |
| 14          | W       | -5.599555       | -1.101027 | 0         |
| 15          | W       | 5.599555        | 1.101027  | 0         |
| 16          | W       | 5.599555        | -1.101027 | 0         |
| 17          | O       | 5.609137        | 1.125147  | 2.111501  |
| 18          | O       | 5.609137        | -1.125147 | 2.111501  |
| 19          | O       | 5.609137        | 1.125147  | -2.111501 |
| 20          | O       | 5.609137        | -1.125147 | -2.111501 |
| 21          | O       | -5.609137       | 1.125147  | 2.111501  |
| 22          | O       | -5.609137       | -1.125147 | 2.111501  |
| 23          | O       | -5.609137       | 1.125147  | -2.111501 |
| 24          | O       | -5.609137       | -1.125147 | -2.111501 |
| 25          | O       | 7.715947        | -1.125552 | 0         |
| 26          | O       | 7.715947        | 1.125552  | 0         |
| 27          | O       | -7.715947       | -1.125552 | 0         |
| 28          | O       | -7.715947       | 1.125552  | 0         |
| 29          | H       | -1.244588       | -2.148921 | 0         |
| 30          | H       | -1.244588       | 2.148921  | 0         |
| 31          | H       | 1.244588        | -2.148921 | 0         |
| 32          | H       | 1.244588        | 2.148921  | 0         |
| 33          | C       | 5.612316        | 0         | 2.715473  |
| 34          | C       | 5.612316        | 0         | -2.715473 |
| 35          | C       | -5.612316       | 0         | 2.715473  |
| 36          | C       | -5.612316       | 0         | -2.715473 |
| 37          | C       | 8.319158        | 0         | 0         |
| 38          | C       | -8.319158       | 0         | 0         |
| 39          | H       | 5.618671        | 0         | -3.807856 |
| 40          | H       | 5.618671        | 0         | 3.807856  |
| 41          | H       | -5.618671       | 0         | -3.807856 |
| 42          | H       | -5.618671       | 0         | 3.807856  |
| 43          | H       | 9.411737        | 0         | 0         |
| 44          | H       | -9.411737       | 0         | 0         |

**Table S3.** Atomic coordinates for the geometry optimized structure of  
[(HCO<sub>2</sub>)<sub>3</sub>Mo<sub>2</sub>]<sub>2</sub>(μ-SOC-C<sub>6</sub>H<sub>4</sub>-COS) [Mo<sub>4</sub>ST'(A)] in C<sub>2</sub> symmetry.

| Atom Number | Element | Coordinates / Å |           |           |
|-------------|---------|-----------------|-----------|-----------|
|             |         | x               | y         | z         |
| 1           | C       | 0.589264        | -0.30283  | 1.266501  |
| 2           | C       | -0.589264       | -0.302865 | -1.266498 |
| 3           | C       | 0.792632        | -0.299354 | -1.147818 |
| 4           | C       | -0.792632       | -0.29932  | 1.147821  |
| 5           | C       | -1.406629       | -0.291793 | -0.120566 |
| 6           | C       | 1.406629        | -0.291792 | 0.12057   |
| 7           | C       | 2.87931         | -0.239485 | 0.203146  |
| 8           | C       | -2.87931        | -0.239485 | -0.203144 |
| 9           | S       | 3.713004        | -0.324574 | 1.712371  |
| 10          | S       | -3.713004       | -0.324596 | -1.712367 |
| 11          | O       | 3.542095        | -0.112789 | -0.88694  |
| 12          | O       | -3.542095       | -0.112777 | 0.886941  |
| 13          | Mo      | -5.579579       | 0.105076  | 1.048925  |
| 14          | Mo      | 5.57958         | 0.105063  | -1.048926 |
| 15          | Mo      | -6.051296       | -0.03094  | -1.022262 |
| 16          | Mo      | 6.051296        | -0.030927 | 1.022262  |
| 17          | O       | 6.384976        | -2.119104 | 0.865702  |
| 18          | O       | -6.384976       | -2.119115 | -0.865674 |
| 19          | O       | 5.910191        | 2.07774   | 1.252009  |
| 20          | O       | -5.910192       | 2.077724  | -1.252036 |
| 21          | O       | 5.856177        | -1.979275 | -1.310404 |
| 22          | O       | -5.856174       | -1.979259 | 1.310429  |
| 23          | O       | 5.38219         | 2.213997  | -0.924471 |
| 24          | O       | -5.382192       | 2.214008  | 0.924443  |
| 25          | O       | 7.621054        | 0.390691  | -1.548505 |
| 26          | O       | -7.621054       | 0.390708  | 1.5485    |
| 27          | O       | 8.140467        | 0.249368  | 0.628463  |
| 28          | O       | -8.140467       | 0.249361  | -0.628466 |
| 29          | H       | -1.04345        | -0.298708 | -2.251758 |
| 30          | H       | 1.04345         | -0.298644 | 2.251762  |
| 31          | H       | -1.414946       | -0.293969 | 2.035274  |
| 32          | H       | 1.414947        | -0.294031 | -2.035271 |
| 33          | C       | 6.219391        | -2.638679 | -0.283231 |
| 34          | C       | -6.219389       | -2.638676 | 0.283265  |
| 35          | C       | 5.611456        | 2.742985  | 0.210705  |
| 36          | C       | -5.611458       | 2.742982  | -0.21074  |
| 37          | C       | 8.460473        | 0.401732  | -0.591277 |
| 38          | C       | -8.460473       | 0.401739  | 0.591272  |
| 39          | H       | 5.548349        | 3.832503  | 0.293869  |
| 40          | H       | -5.548351       | 3.832499  | -0.293918 |
| 41          | H       | 6.399752        | -3.712111 | -0.396195 |
| 42          | H       | -6.399749       | -3.712107 | 0.396242  |
| 43          | H       | 9.51715         | 0.551371  | -0.836308 |
| 44          | H       | -9.51715        | 0.551382  | 0.836302  |

**Table S4.** Atomic coordinates for the geometry optimized structure of  
[(HCO<sub>2</sub>)<sub>3</sub>Mo<sub>2</sub>]<sub>2</sub>(μ-SOC-C<sub>6</sub>H<sub>4</sub>-COS) [Mo<sub>4</sub>ST'(B)] in C<sub>2</sub> symmetry.

| Atom Number | Element | Coordinates / Å |           |           |
|-------------|---------|-----------------|-----------|-----------|
|             |         | x               | y         | z         |
| 1           | C       | 0.278953        | 0.635365  | -0.838978 |
| 2           | C       | -0.282424       | -0.632954 | 1.583623  |
| 3           | C       | 0.282424        | 0.632954  | 1.583623  |
| 4           | C       | -0.278953       | -0.635365 | -0.838978 |
| 5           | C       | -0.572232       | -1.290891 | 0.372772  |
| 6           | C       | 0.572232        | 1.290891  | 0.372772  |
| 7           | C       | 1.175407        | 2.6376    | 0.339606  |
| 8           | C       | -1.175407       | -2.6376   | 0.339606  |
| 9           | S       | 1.697237        | 3.427377  | 1.783629  |
| 10          | S       | -1.697237       | -3.427377 | 1.783629  |
| 11          | O       | 1.319266        | 3.216482  | -0.795281 |
| 12          | O       | -1.319266       | -3.216482 | -0.795281 |
| 13          | Mo      | -2.167578       | -5.065985 | -1.112702 |
| 14          | Mo      | 2.167578        | 5.065985  | -1.112702 |
| 15          | Mo      | -2.61085        | -5.530643 | 0.916508  |
| 16          | Mo      | 2.61085         | 5.530643  | 0.916508  |
| 17          | O       | 4.555594        | 4.692384  | 0.736991  |
| 18          | O       | -4.555594       | -4.692384 | 0.736991  |
| 19          | O       | 0.757269        | 6.541339  | 1.148075  |
| 20          | O       | -0.757269       | -6.541339 | 1.148075  |
| 21          | O       | 4.071407        | 4.176822  | -1.391483 |
| 22          | O       | -4.071407       | -4.176822 | -1.391483 |
| 23          | O       | 0.282424        | 6.023747  | -0.981773 |
| 24          | O       | -0.282424       | -6.023747 | -0.981773 |
| 25          | O       | 2.998715        | 6.909755  | -1.765835 |
| 26          | O       | -2.998715       | -6.909755 | -1.765835 |
| 27          | O       | 3.467752        | 7.417472  | 0.367126  |
| 28          | O       | -3.467752       | -7.417472 | 0.367126  |
| 29          | H       | -0.499565       | -1.121376 | 2.527378  |
| 30          | H       | 0.498658        | 1.134597  | -1.775998 |
| 31          | H       | -0.498658       | -1.134597 | -1.775998 |
| 32          | H       | 0.499565        | 1.121376  | 2.527378  |
| 33          | C       | 4.86325         | 4.202667  | -0.394807 |
| 34          | C       | -4.86325        | -4.202667 | -0.394807 |
| 35          | C       | -0.004156       | 6.572542  | 0.130759  |
| 36          | C       | 0.004156        | -6.572542 | 0.130759  |
| 37          | C       | 3.469396        | 7.686468  | -0.874214 |
| 38          | C       | -3.469396       | -7.686468 | -0.874214 |
| 39          | H       | -0.958994       | 7.1007    | 0.21475   |
| 40          | H       | 0.958994        | -7.1007   | 0.21475   |
| 41          | H       | 5.864882        | 3.779959  | -0.520693 |
| 42          | H       | -5.864882       | -3.779959 | -0.520693 |
| 43          | H       | 3.899422        | 8.639902  | -1.198505 |
| 44          | H       | -3.899422       | -8.639902 | -1.198505 |

**Table S5.** Atomic coordinates for the geometry optimized structure of  
[(HCO<sub>2</sub>)<sub>3</sub>W<sub>2</sub>]<sub>2</sub>(μ-SOC-C<sub>6</sub>H<sub>4</sub>-COS) [W<sub>4</sub>ST'(A)] in C<sub>1</sub> symmetry.

| Atom Number | Element | Coordinates / Å |           |           |
|-------------|---------|-----------------|-----------|-----------|
|             |         | x               | y         | z         |
| 1           | C       | -0.594255       | 1.263405  | -0.312214 |
| 2           | C       | 0.594244        | -1.263391 | -0.312196 |
| 3           | C       | -0.786383       | -1.15154  | -0.309506 |
| 4           | C       | 0.786375        | 1.151547  | -0.309453 |
| 5           | C       | 1.411855        | -0.114225 | -0.300403 |
| 6           | C       | -1.411865       | 0.114232  | -0.300479 |
| 7           | C       | -2.874784       | 0.192255  | -0.247262 |
| 8           | C       | 2.874772        | -0.192252 | -0.247138 |
| 9           | S       | -3.722385       | 1.702444  | -0.295529 |
| 10          | S       | 3.722362        | -1.702447 | -0.295389 |
| 11          | O       | -3.547317       | -0.907033 | -0.142356 |
| 12          | O       | 3.547317        | 0.907036  | -0.142313 |
| 13          | W       | 5.557597        | 1.101363  | 0.071533  |
| 14          | W       | -5.557597       | -1.101366 | 0.071486  |
| 15          | W       | 6.048558        | -1.058395 | -0.019881 |
| 16          | W       | -6.048554       | 1.058398  | -0.019816 |
| 17          | O       | -6.398326       | 0.906718  | -2.098117 |
| 18          | O       | 6.398115        | -0.906662 | -2.098214 |
| 19          | O       | -5.91272        | 1.191001  | 2.091546  |
| 20          | O       | 5.912935        | -1.191057 | 2.091491  |
| 21          | O       | -5.871931       | -1.280417 | -2.006986 |
| 22          | O       | 5.871901        | 1.28051   | -2.006934 |
| 23          | O       | -5.383688       | -0.995403 | 2.174251  |
| 24          | O       | 5.383718        | 0.995297  | 2.1743    |
| 25          | O       | -7.603515       | -1.563388 | 0.350849  |
| 26          | O       | 7.603514        | 1.563376  | 0.350925  |
| 27          | O       | -8.125974       | 0.621895  | 0.260002  |
| 28          | O       | 8.125997        | -0.621888 | 0.259787  |
| 29          | H       | 1.050973        | -2.247577 | -0.308717 |
| 30          | H       | -1.050978       | 2.247582  | -0.308645 |
| 31          | H       | 1.402248        | 2.043599  | -0.30529  |
| 32          | H       | -1.402255       | -2.043593 | -0.305407 |
| 33          | C       | -6.245489       | -0.236526 | -2.642806 |
| 34          | C       | 6.245335        | 0.236622  | -2.642834 |
| 35          | C       | -5.619742       | 0.129212  | 2.732812  |
| 36          | C       | 5.619891        | -0.129317 | 2.732809  |
| 37          | C       | -8.445813       | -0.604311 | 0.386301  |
| 38          | C       | 8.445825        | 0.604306  | 0.386233  |
| 39          | H       | -5.567511       | 0.182132  | 3.822989  |
| 40          | H       | 5.567722        | -0.182279 | 3.822987  |
| 41          | H       | -6.444903       | -0.329797 | -3.712871 |
| 42          | H       | 6.44468         | 0.329933  | -3.712908 |

|    |   |           |           |          |
|----|---|-----------|-----------|----------|
| 43 | H | -9.500204 | -0.853159 | 0.533871 |
| 44 | H | 9.500216  | 0.853146  | 0.533818 |



**Table S6.** Atomic coordinates for the geometry optimized structure of  
[(HCO<sub>2</sub>)<sub>3</sub>W<sub>2</sub>]<sub>2</sub>(μ-SOC-C<sub>6</sub>H<sub>4</sub>-COS) [W<sub>4</sub>ST'(B)] in C<sub>2</sub> symmetry.

| Atom Number | Element | Coordinates / Å |           |           |
|-------------|---------|-----------------|-----------|-----------|
|             |         | x               | y         | z         |
| 1           | C       | 0.261255        | 0.642348  | -0.86895  |
| 2           | C       | -0.26218        | -0.640018 | 1.553057  |
| 3           | C       | 0.26218         | 0.640018  | 1.553057  |
| 4           | C       | -0.261255       | -0.642348 | -0.86895  |
| 5           | C       | -0.535758       | -1.312054 | 0.342575  |
| 6           | C       | 0.535758        | 1.312054  | 0.342575  |
| 7           | C       | 1.098978        | 2.66512   | 0.320693  |
| 8           | C       | -1.098978       | -2.66512  | 0.320693  |
| 9           | S       | 1.502443        | 3.504671  | 1.782606  |
| 10          | S       | -1.502443       | -3.504671 | 1.782606  |
| 11          | O       | 1.307124        | 3.241177  | -0.818445 |
| 12          | O       | -1.307124       | -3.241177 | -0.818445 |
| 13          | W       | -2.137187       | -5.070903 | -1.133854 |
| 14          | W       | 2.137187        | 5.070903  | -1.133854 |
| 15          | W       | -2.439862       | -5.597635 | 0.998306  |
| 16          | W       | 2.439862        | 5.597635  | 0.998306  |
| 17          | O       | 4.396718        | 4.793393  | 0.933139  |
| 18          | O       | -4.396718       | -4.793393 | 0.933139  |
| 19          | O       | 0.57441         | 6.596879  | 1.029927  |
| 20          | O       | -0.57441        | -6.596879 | 1.029927  |
| 21          | O       | 4.076228        | 4.232941  | -1.222255 |
| 22          | O       | -4.076228       | -4.232941 | -1.222255 |
| 23          | O       | 0.26218         | 6.03844   | -1.126977 |
| 24          | O       | -0.26218        | -6.03844  | -1.126977 |
| 25          | O       | 3.003038        | 6.918674  | -1.712722 |
| 26          | O       | -3.003038       | -6.918674 | -1.712722 |
| 27          | O       | 3.31276         | 7.470041  | 0.44466   |
| 28          | O       | -3.31276        | -7.470041 | 0.44466   |
| 29          | H       | -0.464484       | -1.13171  | 2.498317  |
| 30          | H       | 0.466607        | 1.144934  | -1.807659 |
| 31          | H       | -0.466607       | -1.144934 | -1.807659 |
| 32          | H       | 0.464484        | 1.13171   | 2.498317  |
| 33          | C       | 4.796832        | 4.294953  | -0.16951  |
| 34          | C       | -4.796832       | -4.294953 | -0.16951  |
| 35          | C       | -0.107255       | 6.612401  | -0.046994 |
| 36          | C       | 0.107255        | -6.612401 | -0.046994 |
| 37          | C       | 3.403241        | 7.717455  | -0.801385 |
| 38          | C       | -3.403241       | -7.717455 | -0.801385 |
| 39          | H       | -1.06054        | 7.146197  | -0.048237 |
| 40          | H       | 1.06054         | -7.146197 | -0.048237 |
| 41          | H       | 5.813788        | 3.898316  | -0.218209 |
| 42          | H       | -5.813788       | -3.898316 | -0.218209 |
| 43          | H       | 3.848264        | 8.667061  | -1.110834 |
| 44          | H       | -3.848264       | -8.667061 | -1.110834 |

**Table S7.** Atomic coordinates for the geometry optimized structure of  $[(\text{HCO}_2)_3\text{Mo}_2]_2(\mu\text{-S}_2\text{C-C}_6\text{H}_4\text{-CS}_2)$  ( $\text{Mo}_4\text{S}_2\text{T}'$ ) in  $C_s$  symmetry. An imaginary frequency ( $34i$ ) appeared in the frequency analysis despite repeated efforts at changing symmetry and basis set changes.

| Atom Number | Element | Coordinates / Å |           |           |
|-------------|---------|-----------------|-----------|-----------|
|             |         | x               | y         | z         |
| 1           | C       | 0.000195        | 0.692751  | 1.204035  |
| 2           | C       | 0.000195        | 0.692751  | -1.204035 |
| 3           | C       | 0.000146        | -0.692751 | 1.204035  |
| 4           | C       | 0.000146        | -0.692751 | -1.204035 |
| 5           | C       | 0.000056        | -1.430487 | 0.000000  |
| 6           | C       | 0.000161        | 1.430487  | 0.000000  |
| 7           | C       | 0.000066        | 2.907310  | 0.000000  |
| 8           | C       | -0.000138       | -2.907310 | 0.000000  |
| 9           | S       | -0.000013       | 3.755933  | 1.487450  |
| 10          | S       | -0.000013       | 3.755933  | -1.487450 |
| 11          | S       | -0.000183       | -3.755934 | 1.487450  |
| 12          | S       | -0.000183       | -3.755934 | -1.487450 |
| 13          | Mo      | -0.000069       | -6.137829 | 1.065967  |
| 14          | Mo      | -0.000069       | -6.137829 | -1.065967 |
| 15          | Mo      | -0.000062       | 6.137829  | 1.065967  |
| 16          | Mo      | -0.000062       | 6.137829  | -1.065967 |
| 17          | O       | 2.122952        | 6.264114  | 1.121490  |
| 18          | O       | 2.122952        | 6.264114  | -1.121490 |
| 19          | O       | -2.123016       | 6.264068  | 1.121482  |
| 20          | O       | -2.123016       | 6.264068  | -1.121482 |
| 21          | O       | 2.122972        | -6.263882 | 1.121491  |
| 22          | O       | 2.122972        | -6.263882 | -1.121491 |
| 23          | O       | -2.122997       | -6.264300 | 1.121481  |
| 24          | O       | -2.122997       | -6.264300 | -1.121481 |
| 25          | O       | 0.000217        | 8.287396  | -1.121861 |
| 26          | O       | 0.000217        | 8.287396  | 1.121861  |
| 27          | O       | 0.000473        | -8.287396 | -1.121861 |
| 28          | O       | 0.000473        | -8.287396 | 1.121861  |
| 29          | H       | 0.000173        | -1.214705 | -2.154254 |
| 30          | H       | 0.000173        | -1.214705 | 2.154254  |
| 31          | H       | 0.000255        | 1.214705  | -2.154254 |
| 32          | H       | 0.000255        | 1.214705  | 2.154254  |
| 33          | C       | 2.718964        | 6.322823  | 0.000000  |
| 34          | C       | -2.719069       | 6.322644  | 0.000000  |
| 35          | C       | 2.718983        | -6.322540 | 0.000000  |
| 36          | C       | -2.719050       | -6.322927 | 0.000000  |
| 37          | C       | 0.000106        | 8.883647  | 0.000000  |
| 38          | C       | 0.000373        | -8.883648 | 0.000000  |
| 39          | H       | -3.808325       | 6.429308  | 0.000000  |
| 40          | H       | 3.808199        | 6.429759  | 0.000000  |
| 41          | H       | -3.808296       | -6.429680 | 0.000000  |
| 42          | H       | 3.808229        | -6.429387 | 0.000000  |
| 43          | H       | -0.000079       | 9.979303  | 0.000000  |
| 44          | H       | 0.000218        | -9.979302 | 0.000000  |

**Table S8.** Atomic coordinates for the geometry optimized structure of  $[(\text{HCO}_2)_3\text{W}_2]_2(\mu\text{-S}_2\text{C-C}_6\text{H}_4\text{-CS}_2)$  ( $\text{W}_4\text{S}_2\text{T}'$ ) in  $\text{C}_1$  symmetry. An imaginary frequency (29i) appeared in the frequency analysis despite repeated efforts at changing symmetry and basis set changes.

| Atom Number | Element | Coordinates / Å |           |           |
|-------------|---------|-----------------|-----------|-----------|
|             |         | x               | y         | z         |
| 1           | C       | -0.692154       | 1.203515  | -0.001519 |
| 2           | C       | -0.692169       | -1.203479 | -0.001367 |
| 3           | C       | 0.692170        | 1.203506  | -0.001488 |
| 4           | C       | 0.692154        | -1.203488 | -0.001317 |
| 5           | C       | 1.434811        | 0.000004  | -0.001328 |
| 6           | C       | -1.434810       | 0.000022  | -0.001413 |
| 7           | C       | -2.904499       | 0.000022  | -0.001228 |
| 8           | C       | 2.904499        | -0.000001 | -0.001069 |
| 9           | S       | -3.762348       | 1.490987  | -0.001025 |
| 10          | S       | -3.762325       | -1.490956 | -0.001056 |
| 11          | S       | 3.762341        | 1.490970  | -0.000773 |
| 12          | S       | 3.762341        | -1.490969 | -0.000924 |
| 13          | W       | 6.126508        | 1.110707  | 0.000184  |
| 14          | W       | 6.126510        | -1.110711 | 0.000104  |
| 15          | W       | -6.126518       | 1.110707  | 0.000128  |
| 16          | W       | -6.126501       | -1.110710 | 0.000140  |
| 17          | O       | -6.289966       | 1.124972  | -2.113431 |
| 18          | O       | -6.289989       | -1.124957 | -2.113453 |
| 19          | O       | -6.287466       | 1.124951  | 2.113942  |
| 20          | O       | -6.287410       | -1.124979 | 2.113920  |
| 21          | O       | 6.289721        | 1.125011  | -2.113432 |
| 22          | O       | 6.289734        | -1.124917 | -2.113473 |
| 23          | O       | 6.287693        | 1.124914  | 2.113945  |
| 24          | O       | 6.287679        | -1.125018 | 2.113903  |
| 25          | O       | -8.274823       | -1.124479 | 0.001501  |
| 26          | O       | -8.274842       | 1.124440  | 0.001411  |
| 27          | O       | 8.274834        | -1.124457 | 0.001103  |
| 28          | O       | 8.274832        | 1.124462  | 0.001209  |
| 29          | H       | 1.212183        | -2.154934 | -0.001218 |
| 30          | H       | 1.212213        | 2.154944  | -0.001538 |
| 31          | H       | -1.212212       | -2.154917 | -0.001303 |
| 32          | H       | -1.212182       | 2.154960  | -0.001593 |
| 33          | C       | -6.362564       | 0.000006  | -2.709001 |
| 34          | C       | -6.359311       | -0.000013 | 2.709571  |
| 35          | C       | 6.362244        | 0.000066  | -2.709020 |
| 36          | C       | 6.359624        | -0.000070 | 2.709554  |
| 37          | C       | -8.872169       | -0.000024 | 0.001821  |
| 38          | C       | 8.872170        | 0.000003  | 0.001464  |
| 39          | H       | -6.488822       | -0.000043 | 3.794638  |
| 40          | H       | -6.493386       | 0.000034  | -3.793910 |
| 41          | H       | 6.489259        | -0.000082 | 3.794607  |
| 42          | H       | 6.492941        | 0.000077  | -3.793944 |
| 43          | H       | -9.966390       | -0.000034 | 0.002488  |
| 44          | H       | 9.966391        | 0.000003  | 0.002008  |

**Figure S1.** Diagrams of the calculated structures for  $W_4T'$ ,  $W_4ST'(A)$ ,  $W_4ST'(B)$  and  $W_4S_2T'$ . Structures for the molybdenum analogues are qualitatively similar.

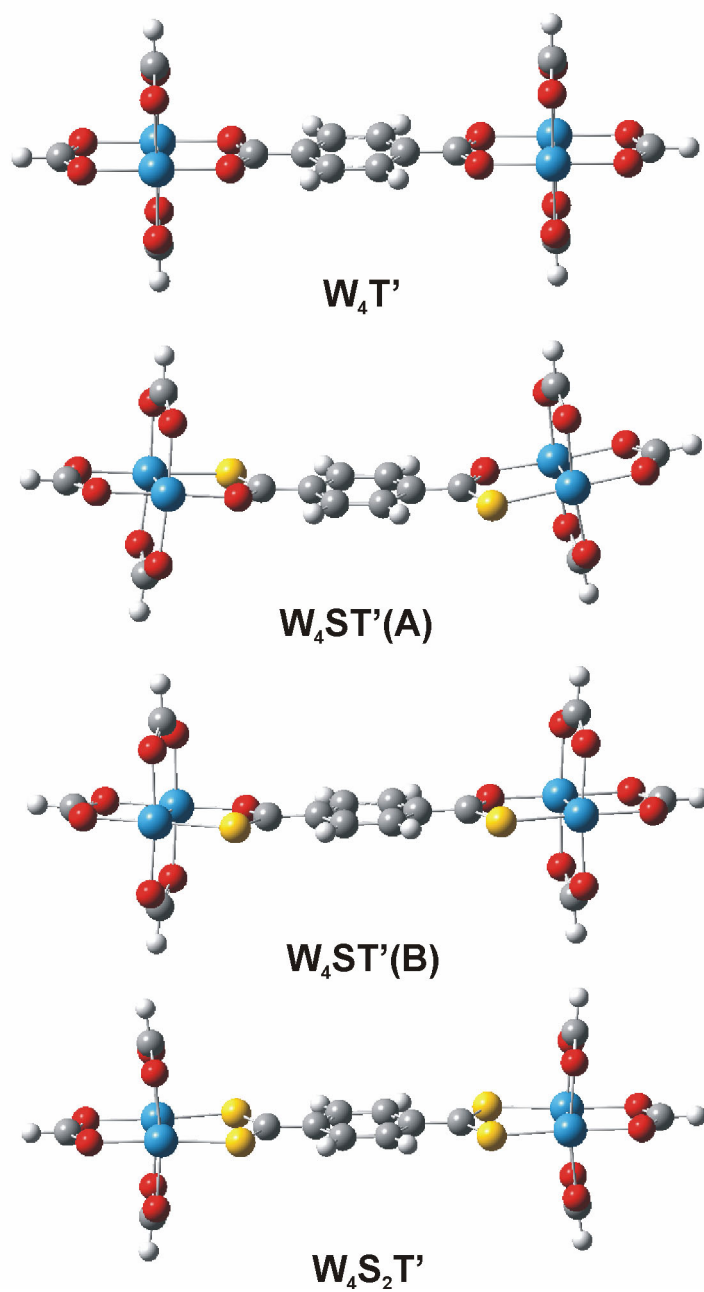

**Figure S2.** Cyclic voltammogram (bottom) and differential pulse voltammogram (top) for Mo4ST. Potentials are referenced to the  $\text{FeCp}_2^{0/+}$  couple at 0 V.

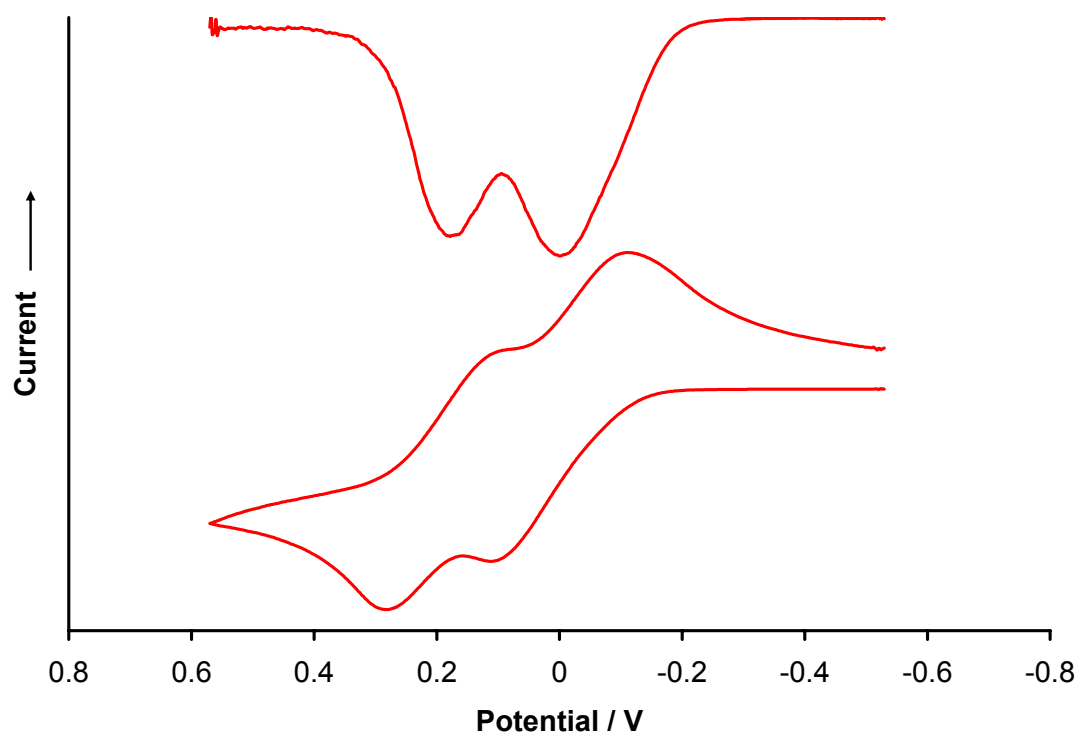

**Figure S3.** Cyclic voltammogram (bottom) and differential pulse voltammogram (top) for W4ST. Potentials are referenced to the  $\text{FeCp}_2^{0/+}$  couple at 0 V.

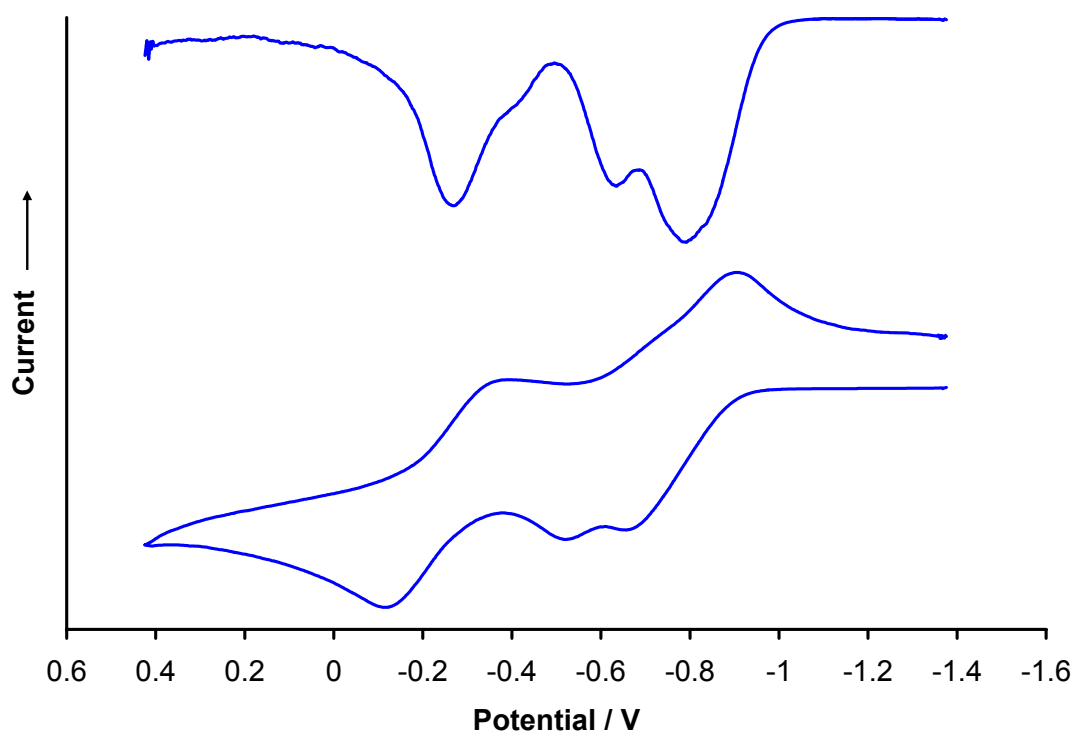

Supplement: b600983b.pdf [file b600983b.pdf]
